# Supplementary material for: Defining Metaniches in the Oral Cavity According to Their Microbial Composition and Cytokine Profile
Source: MDPI journal article supplement (doi:10.3390/ijms21218218), 2020-11-03
Supplement: s1 [file s1]

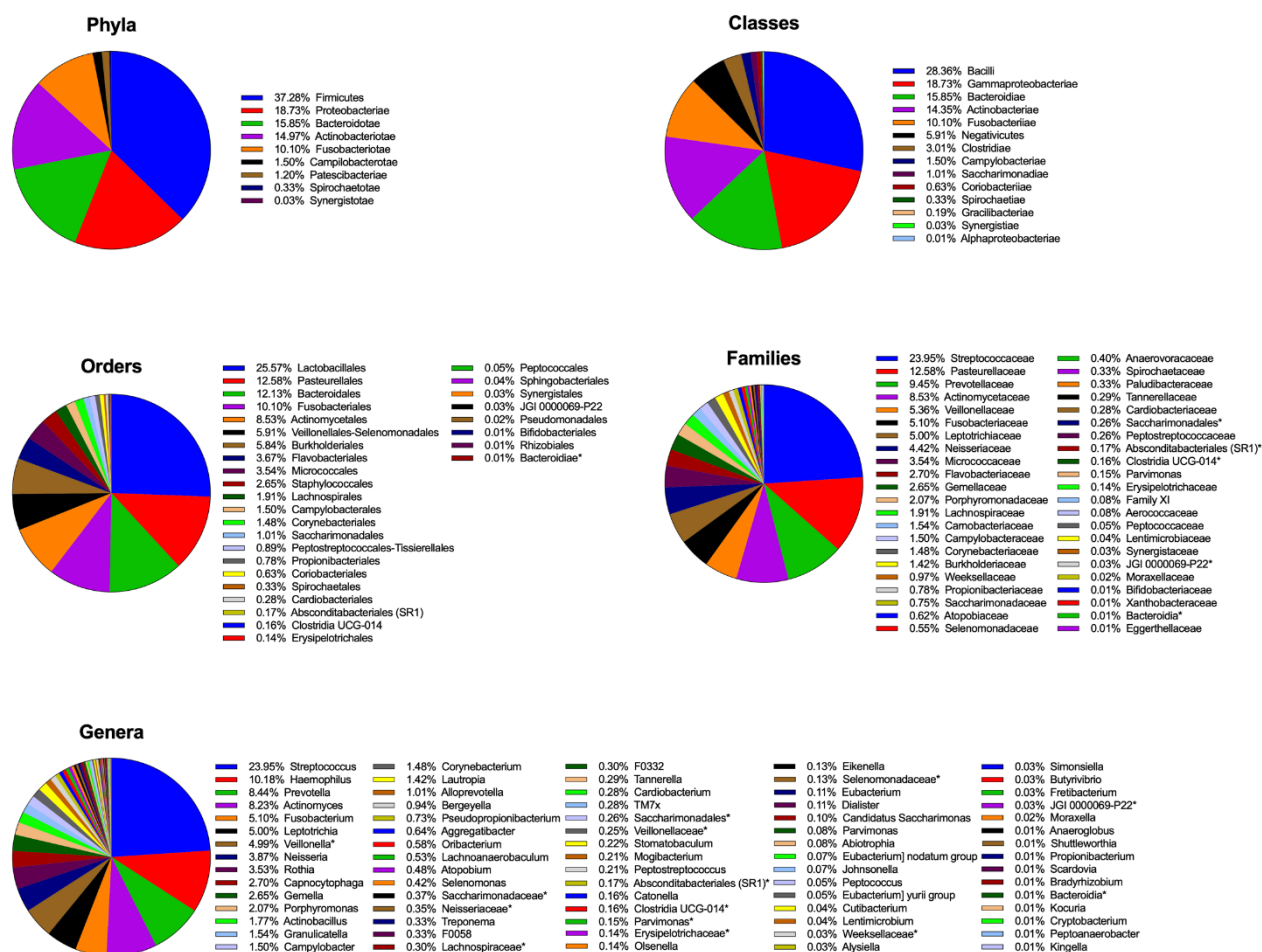

**Figure S1:** Oral microbiota composition as detected by sequencing of 16S rRNA genes in order of ranked-based classification on phylum level, class level, order level, family level and genus level. \* indicates unnamed specification.

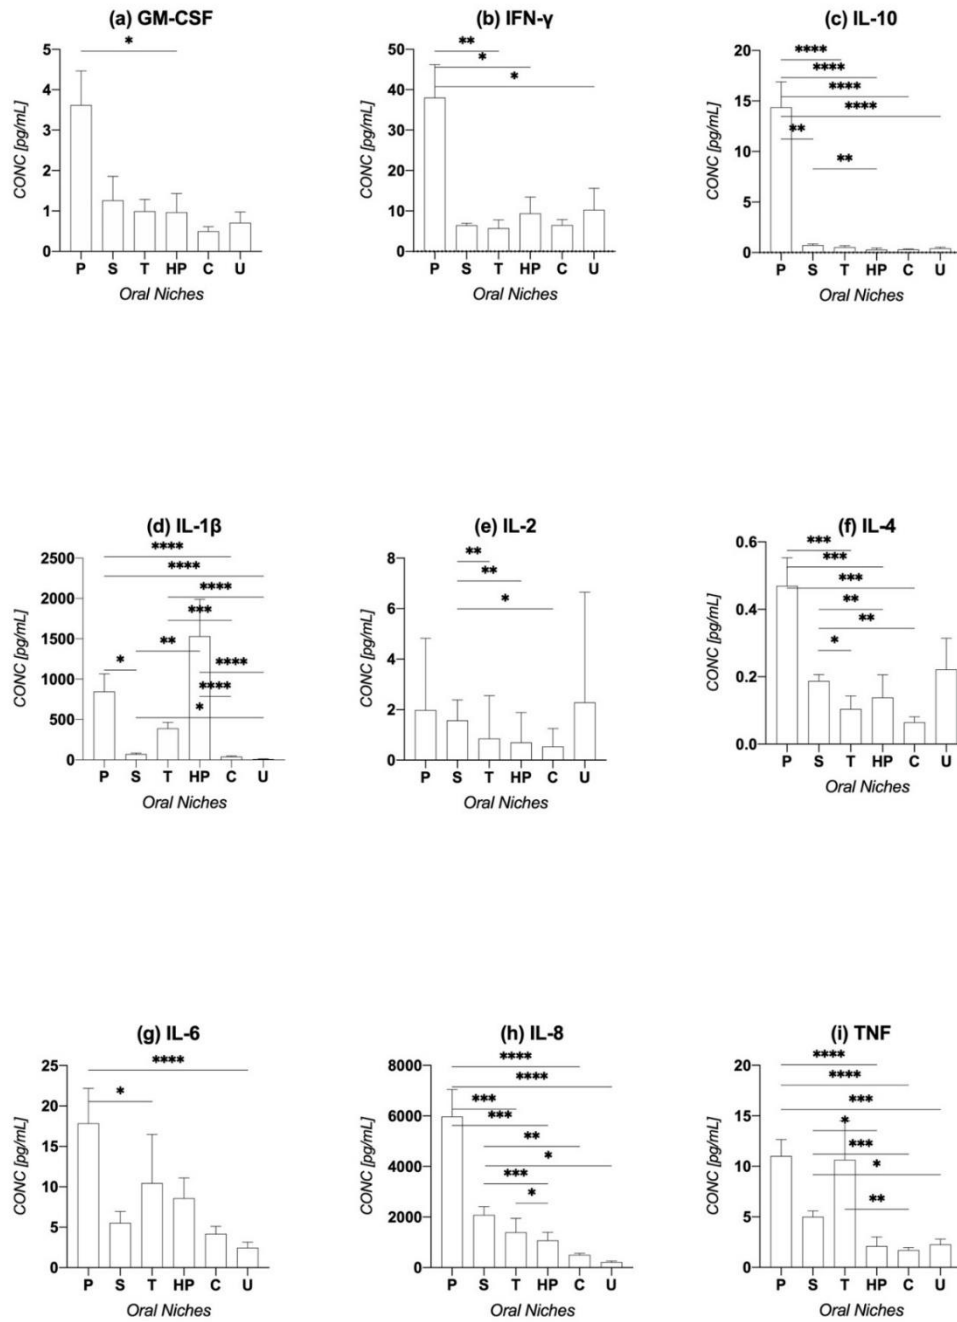

**Figure S2.** Histograms representing the concentrations of (a) GM-CSF, (b) IFN- $\gamma$ , (c) IL-10, (d) IL-1 $\beta$ , (e) IL-2, (f) IL-4, (g) IL-6, (h) IL-8, (i) TNF in defined oral niches. P, supragingival plaque; S, saliva; T, tongue; HP, hard palate; C, cheek; U, sublingual area. The data is presented as mean and standard error of mean (SEM). N=20, \*  $0.01 \leq p < 0.05$ , \*\*  $0.001 \leq p < 0.01$ , \*\*\*  $0.0001 \leq p < 0.001$ , \*\*\*\*  $p < 0.0001$ .

**Table S1.** Clinical parameters of the study population are given. Number, #; Periodontal probing depth, PPD; Bleeding-on-Probing-Index, BOP; Approximal-Plaque-Index, API.

| Subject # | Teeth | PPD | BOP  | API | Oral Hygiene |              |             |
|-----------|-------|-----|------|-----|--------------|--------------|-------------|
|           |       |     |      |     | Toothbrush   | Floss        | Prophylaxis |
| 001       | 28    | 1.6 | 0%   | 14% | powered      | regularly    | regularly   |
| 002       | 28    | 1.4 | 0.6% | 18% | powered      | occasionally | regularly   |
| 003       | 28    | 1.6 | 0%   | 11% | powered      | occasionally | regularly   |
| 004       | 28    | 1.6 | 0%   | 18% | powered      | occasionally | regularly   |
| 005       | 32    | 1.7 | 0.5% | 7%  | powered      | regularly    | regularly   |
| 006       | 28    | 2.1 | 2.4% | 18% | powered      | occasionally | regularly   |
| 007       | 28    | 1.6 | 2.4% | 14% | powered      | regularly    | regularly   |
| 008       | 32    | 2.1 | 1%   | 14% | powered      | regularly    | regularly   |
| 009       | 28    | 2.3 | 0%   | 14% | powered      | regularly    | regularly   |
| 010       | 32    | 1.5 | 0%   | 14% | powered      | occasionally | regularly   |
| 011       | 28    | 1.7 | 1.2% | 11% | powered      | occasionally | regularly   |
| 012       | 32    | 1.7 | 0%   | 18% | powered      | regularly    | regularly   |
| 013       | 28    | 1.8 | 0%   | 14% | powered      | occasionally | regularly   |
| 014       | 30    | 1.4 | 0%   | 11% | powered      | regularly    | regularly   |
| 015       | 28    | 1.8 | 0%   | 7%  | powered      | regularly    | regularly   |
| 016       | 26    | 2.1 | 1.3% | 7%  | powered      | regularly    | regularly   |
| 017       | 28    | 1.9 | 0.6% | 14% | powered      | occasionally | regularly   |
| 018       | 28    | 1.9 | 1.2% | 11% | powered      | regularly    | regularly   |
| 019       | 28    | 2.4 | 1.2% | 18% | powered      | regularly    | regularly   |
| 020       | 31    | 2.1 | 1.6% | 7%  | powered      | occasionally | regularly   |
